# Supplementary material for: Selected Polymorphisms of Base Excision Repair Genes and Pancreatic Cancer Risk in Japanese
Source: PubMed Central journal article supplement (PMC3798558; doi:10.2188/jea.je20120010), 2012-11-05
Supplement: je-22-477-s001.pdf [file je-22-477-s001.pdf]

eTable 1. Gene-environment interaction of *XRCC1* and *APE1* genotypes with selected risk factors for pancreatic cancer (PC)

| Genotype         | Exposure of each environmental factor | Current BMI*        |                    | BMI* at age 20      |                    | Smoking <sup>§</sup> |                    | Heavy Smoking <sup>§</sup> |                    | Alcohol <sup>†</sup> |                    | Diabetes Mellitus <sup>  </sup> |                    | Family history of PC <sup>††</sup> |                    |
|------------------|---------------------------------------|---------------------|--------------------|---------------------|--------------------|----------------------|--------------------|----------------------------|--------------------|----------------------|--------------------|---------------------------------|--------------------|------------------------------------|--------------------|
|                  |                                       | No. of case/control | ORs (95% CI)       | No. of case/control | ORs (95% CI)       | No. of case/control  | ORs (95% CI)       | No. of case/control        | ORs (95% CI)       | No. of case/control  | ORs (95% CI)       | No. of case/control             | ORs (95% CI)       | No. of case/control                | ORs (95% CI)       |
|                  | (-)                                   | 146/1096            | 1.00 (ref.)        | 162/1344            | 1.00 (ref.)        | 69/638               | 1.00 (ref.)        | 91/844                     | 1.00 (ref.)        | 106/913              | 1.00 (ref.)        | 148/1339                        | 1.00 (ref.)        | 177/1407                           | 1.00 (ref.)        |
|                  | (+)                                   | 39/356              | 0.72 (0.48 - 1.07) | 17/86               | 1.68 (0.93 - 3.04) | 116/818              | 1.66 (1.10 - 2.52) | 94/612                     | 1.71 (1.16 - 2.51) | 74/535               | 1.07 (0.49 - 2.32) | 37/126                          | 2.61 (1.69 - 4.04) | 8/58                               | 1.06 (0.49 - 2.31) |
| <b>rs1799782</b> |                                       |                     |                    |                     |                    |                      |                    |                            |                    |                      |                    |                                 |                    |                                    |                    |
| CC               | (-)                                   | 69/517              | 1.00 (ref.)        | 78/636              | 1.00 (ref.)        | 30/294               | 1.00 (ref.)        | 40/396                     | 1.00 (ref.)        | 46/430               | 1.00 (ref.)        | 66/619                          | 1.00 (ref.)        | 82/648                             | 1.00 (ref.)        |
| CT&TT            | (-)                                   | 77/577              | 0.98 (0.68 - 1.39) | 84/708              | 0.98 (0.70 - 1.37) | 39/344               | 1.06 (0.63 - 1.77) | 51/448                     | 1.01 (0.69 - 1.48) | 63/483               | 1.20 (0.79 - 1.82) | 82/720                          | 1.02 (0.72 - 1.45) | 95/759                             | 0.97 (0.70 - 1.34) |
| CC               | (+)                                   | 19/153              | 0.79 (0.45 - 1.39) | 7 / 28              | 2.23 (0.89 - 5.57) | 58/375               | 1.84 (1.07 - 3.16) | 48/273                     | 2.43 (1.44 - 4.08) | 41/239               | 1.74 (1.07 - 2.81) | 22/58                           | 3.40 (1.88 - 6.11) | 6 / 29                             | 1.52 (0.59 - 3.90) |
| CT&TT            | (+)                                   | 20/203              | 0.64 (0.37 - 1.13) | 10/58               | 1.40 (0.66 - 2.99) | 58/443               | 1.60 (0.92 - 2.77) | 46/339                     | 1.83 (1.09 - 3.10) | 33/296               | 1.14 (0.69 - 1.90) | 15/68                           | 1.97 (1.02 - 3.81) | 2 / 29                             | 0.54 (0.12 - 2.37) |
| interaction P    |                                       | 0.649               |                    | 0.456               |                    | 0.546                |                    | 0.408                      |                    | 0.070                |                    | 0.195                           |                    | 0.240                              |                    |
| <b>rs25487</b>   |                                       |                     |                    |                     |                    |                      |                    |                            |                    |                      |                    |                                 |                    |                                    |                    |
| GG               | (-)                                   | 73/636              | 1.00 (ref.)        | 78/772              | 1.00 (ref.)        | 31/363               | 1.00 (ref.)        | 44/486                     | 1.00 (ref.)        | 55/522               | 1.00 (ref.)        | 73/765                          | 1.00 (ref.)        | 91/807                             | 1.00 (ref.)        |
| GA&AA            | (-)                                   | 73/458              | 1.47 (1.03 - 2.10) | 84/572              | 1.43 (1.02 - 2.00) | 38/275               | 1.66 (0.99 - 2.77) | 47/358                     | 1.61 (1.10 - 2.36) | 54/391               | 1.35 (0.90 - 2.05) | 75/574                          | 1.35 (0.96 - 1.92) | 86/600                             | 1.32 (0.95 - 1.83) |
| GG               | (+)                                   | 20/198              | 0.80 (0.47 - 1.39) | 13/49               | 2.54 (1.26 - 5.11) | 62/474               | 1.93 (1.13 - 3.29) | 49/351                     | 2.62 (1.60 - 4.28) | 37/311               | 1.21 (0.76 - 1.95) | 20/77                           | 2.45 (1.36 - 4.42) | 2/35                               | 0.47 (0.11 - 2.06) |
| GA&AA            | (+)                                   | 19/158              | 0.90 (0.51 - 1.58) | 4/37                | 1.17 (0.39 - 3.54) | 54/344               | 2.35 (1.37 - 4.02) | 45/261                     | 2.63 (1.51 - 4.57) | 37/224               | 1.82 (1.12 - 2.93) | 17/49                           | 3.95 (2.09 - 7.47) | 6 / 23                             | 2.41 (0.92 - 6.29) |
| interaction P    |                                       | 0.490               |                    | 0.069               |                    | 0.354                |                    | 0.183                      |                    | 0.765                |                    | 0.691                           |                    | 0.112                              |                    |
| <b>rs1130409</b> |                                       |                     |                    |                     |                    |                      |                    |                            |                    |                      |                    |                                 |                    |                                    |                    |
| TT               | (-)                                   | 67/417              | 1.00 (ref.)        | 69/504              | 1.00 (ref.)        | 25/230               | 1.00 (ref.)        | 34/307                     | 1.00 (ref.)        | 48/339               | 1.00 (ref.)        | 61/498                          | 1.00 (ref.)        | 74/517                             | 1.00 (ref.)        |
| TG&GG            | (-)                                   | 79/677              | 0.74 (0.52 - 1.06) | 93/840              | 0.82 (0.58 - 1.15) | 44/408               | 1.06 (0.62 - 1.81) | 57/537                     | 0.87 (0.59 - 1.28) | 61/574               | 0.77 (0.51 - 1.17) | 87/841                          | 0.84 (0.59 - 1.20) | 103/890                            | 0.81 (0.58 - 1.13) |
| TT               | (+)                                   | 10/122              | 0.47 (0.23 - 0.96) | 6 / 27              | 1.62 (0.62 - 4.26) | 52/308               | 2.08 (1.16 - 3.73) | 43/231                     | 2.28 (1.30 - 3.99) | 28/198               | 1.14 (0.67 - 1.93) | 16/44                           | 2.68 (1.36 - 5.26) | 3 / 25                             | 0.72 (0.21 - 2.53) |
| TG&GG            | (+)                                   | 29/234              | 0.67 (0.41 - 1.11) | 11/59               | 1.42 (0.67 - 2.99) | 64/510               | 1.51 (0.86 - 2.68) | 51/381                     | 1.71 (1.02 - 2.85) | 46/337               | 1.07 (0.67 - 1.71) | 21/82                           | 2.16 (1.21 - 3.86) | 5/33                               | 1.13 (0.41 - 3.07) |
| interaction P    |                                       | 0.112               |                    | 0.911               |                    | 0.264                |                    | 0.672                      |                    | 0.559                |                    | 0.925                           |                    | 0.420                              |                    |

NOTE—Odds ratio (OR) (95% CI): Unconditional logistic regression model adjusted for age, sex, current BMI, BMI at age 20, smoking status, drinking habit, diabetes mellitus, and family history of PC. Interactions between environmental factors and genotypes were assessed by likelihood ratio tests between the logistic regression models, with and without interaction terms, between genes and environmental factors of interest.

\* BMI <25 vs. ≥ 25

§ Smoking: pack-years < 5 vs. ≥ 5; Heavy Smoking: pack-years < 40 vs. ≥ 40

† Alcohol: g ethanol/day < 23 vs. ≥23

|| Diabetes Mellitus: no vs. yes

†† Family history of PC: no vs. yes

eTable 2. Smoking duration/intensity and the risk of pancreatic cancer (PC)

|                                               | No. of case/controls | Unadjusted OR <sup>†</sup> | Adjusted OR <sup>††</sup> | Gene-environmental interactions <sup>‡</sup> |                 |                  |
|-----------------------------------------------|----------------------|----------------------------|---------------------------|----------------------------------------------|-----------------|------------------|
|                                               |                      |                            |                           | rs1799782 (XRCC1)                            | rs25487 (XRCC1) | rs1130409 (APE1) |
| <b>Smoking duration (years)</b>               |                      |                            |                           |                                              |                 |                  |
| never smoker                                  | 65/581               | 1.00 (ref.)                | 1.00 (ref.)               |                                              |                 |                  |
| >0 but <20                                    | 24/207               | 0.84 (0.52–1.36)           | 1.00 (0.58–1.73)          |                                              |                 |                  |
| ≥20 but <30                                   | 23/187               | 1.12 (0.75–1.68)           | 1.58 (0.95–2.64)          | P=0.446                                      | P=0.867         | P=0.518          |
| ≥30 but <40                                   | 36/279               | 1.63 (0.94–2.83)           | 2.11 (1.10–4.04)          |                                              |                 |                  |
| ≥40                                           | 37/202               | 1.82 (1.15–2.88)           | 2.48 (1.40–4.37)          |                                              |                 |                  |
| Unknown                                       | 0/9                  |                            |                           |                                              |                 |                  |
| <b>Smoking intensity (cigarettes per day)</b> |                      |                            |                           |                                              |                 |                  |
| never smoker                                  | 65/580               | 1.00 (ref.)                | 1.00 (ref.)               |                                              |                 |                  |
| >0 but <20                                    | 25/266               | 1.04 (0.63–1.70)           | 1.39 (0.78–2.48)          |                                              |                 |                  |
| ≥20 but <30                                   | 44/350               | 1.10 (0.66–1.82)           | 1.34 (0.75–2.48)          | P=0.351                                      | P=0.713         | P=0.444          |
| ≥30 but <40                                   | 19/104               | 1.15 (0.75–1.78)           | 1.42 (0.83–2.43)          |                                              |                 |                  |
| ≥40                                           | 32/157               | 1.64 (1.06–2.53)           | 2.03 (1.17–3.52)          |                                              |                 |                  |
| Unknown                                       | 0/8                  |                            |                           |                                              |                 |                  |

<sup>†</sup>Unconditional logistic regression model (unadjusted).

<sup>††</sup>Unconditional logistic regression model adjusted for age, sex, current BMI, BMI at age 20, smoking status, drinking habit, diabetes mellitus, and family history of PC.

<sup>‡</sup>Interactions between environmental factors and genotypes were assessed by likelihood ratio tests between the logistic regression models, with and without interaction terms, between genes and environmental factors of interest. Genotype: major homozygous vs. heterozygous and minor homozygous. Environmental factors: Smoking duration: <20 years vs. ≥20 years, Smoking intensity: <20 cigarettes vs. ≥20 cigarettes. Analysis was adjusted for age, sex, current BMI, BMI at age 20, smoking status, drinking habit, diabetes mellitus, and family history of PC.
